# Supplementary material for: Cardiac MLC2 kinase is localized to the Z-disc and interacts with α-actinin2
Source: PubMed Central journal article supplement (PMC6715661; doi:10.1038/s41598-019-48884-w), 2019-08-29
Supplement: 41598_2019_48884_MOESM1_ESM.pdf [file 41598_2019_48884_MOESM1_ESM.pdf]

## **Supplemental materials**

### **Cardiac MLC2 kinase is localized to the Z-disc and interacts with $\alpha$ -actinin2**

Lawrence Cai, Yohei Tanada, Gregory Bello, James Fleming, Fariz Alkassis, Thomas Ladd, Todd Golde, Jin Koh, Sixue Chen, and Hideko Kasahara

# Supplemental Figure 1

**Identification of two additional Z-line localized proteins in LC-MS/MS analysis.** (A) List of the coverage, peptide sequences, unique peptides, peptide-spectra match (PSM), peptide confidence, and peptide masses, mass error in part per million (ppm), Mascot score, Expectation (Pval) for Cardiac actin (actin, alpha cardiac muscle) and CSRP3 (Cysteine and glycine-rich protein 3, MLP). Representative mass spectra for Cardiac actin (B) and CSRP3 (C) showing relative intensity (y-axis) and mass-to-charge ratio (m/z, x-axis).

**A**

| Gene Annotation                     | Coverage | Peptide Sequence       | PSMs | Peptide Confidence | Observed Mass (MS1) | Theoretical Mass | Calculated Mass | Charge status | ppm  | Mascot Score | Expectation (Pval) |
|-------------------------------------|----------|------------------------|------|--------------------|---------------------|------------------|-----------------|---------------|------|--------------|--------------------|
| Actin, alpha cardiac muscle 1       | 15%      | K.AGFAGDDAPR.A         | 3    | 100%               | 488.7301            | 975.4456         | 975.441         | 2+            | 4.75 | 44           | 4.00E-05           |
|                                     |          | K.DSYVGDEAQSQR.G       | 2    | 98%                | 677.8178            | 1353.6211        | 1353.616        | 2+            | 3.7  | 31           | 0.0008             |
|                                     |          | K.SYELPDGQVITIGNER.F   | 3    | 100%               | 895.9535            | 1789.8925        | 1789.885        | 2+            | 4.42 | 68           | 1.60E-07           |
|                                     |          | R.VAPEEHPTLLTEAPLNPK.A | 2    | 100%               | 978.5302            | 1955.0457        | 1955.036        | 2+            | 4.8  | 36           | 0.00025            |
| Cysteine and glycine-rich protein 3 | 6%       | R.AATTSNPSKFSK.F       | 1    | 99%                | 655.3435            | 1308.6725        | 1308.667        | 2+            | 3.9  | 35           | 0.00035            |

**B Cardiac actin**

R.AATTSNPSKFSK.F

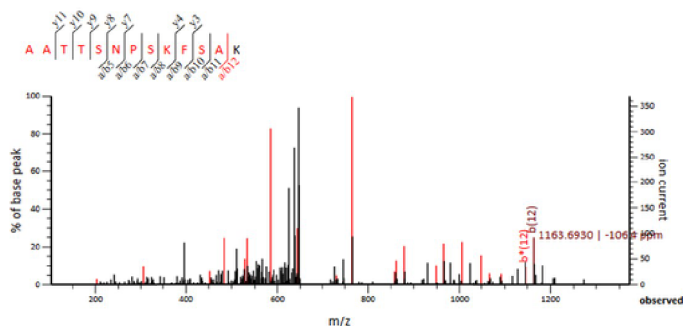

K.DSYVGDEAQSQR.G

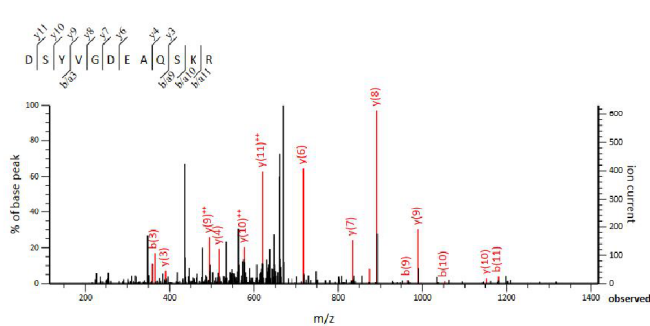

K.SYELPDGQVITIGNER.F

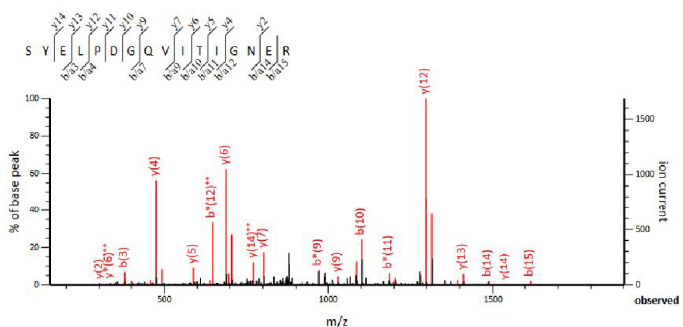

R.VAPEEHPTLLTEAPLNPK.A

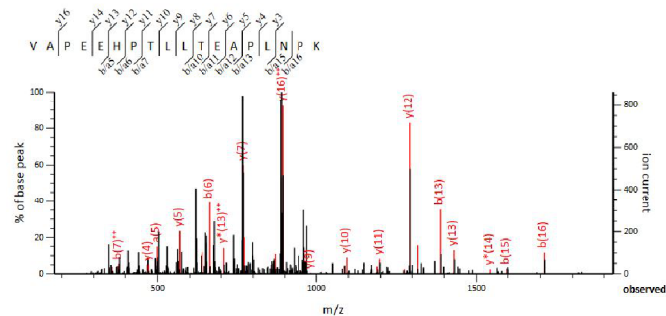

**C CSRP3 (MLP)**

R.AATTSNPSKFSK.F

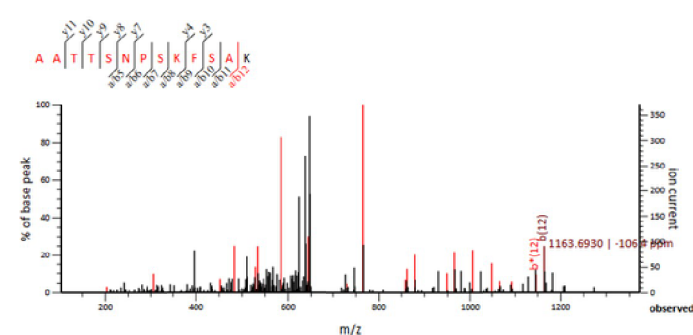

# Supplemental Figure 2

**Identification of domains required for interaction between cMLCK and  $\alpha$ -actinin2.** (A) Schematics of the cMLCK protein and the results of three independent experiments using series of cMLCK deletion mutants mixed with full-length  $\alpha$ -actinin2. (B) Schematics of  $\alpha$ -actinin2 protein and the results of experiments using series of  $\alpha$ -actinin2 deletion mutants mixed with full-length cMLCK. Presence (+) and absence (-) of interaction between two proteins are indicated.

## A cMLCK deletion mutants

### Experiment 1

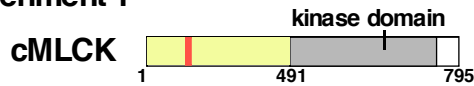

#### Interaction

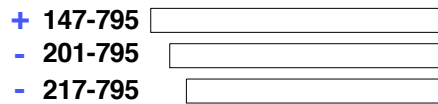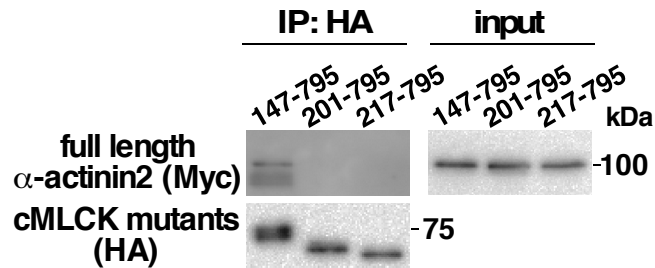

### Experiment 2

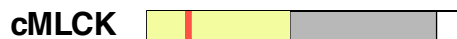

#### Interaction

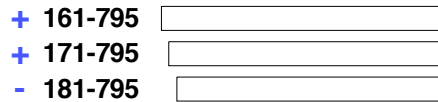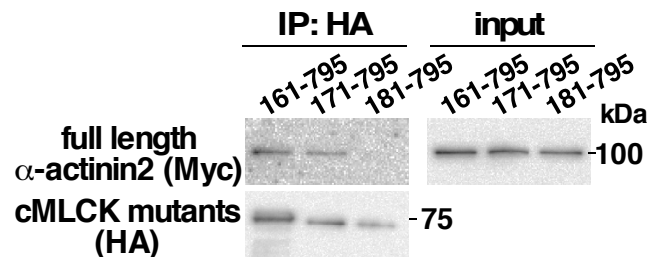

## B $\alpha$ -actinin2 deletion mutants

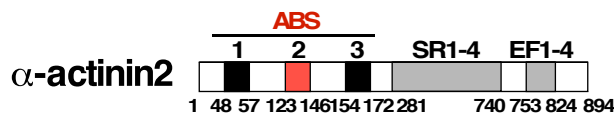

#### Interaction

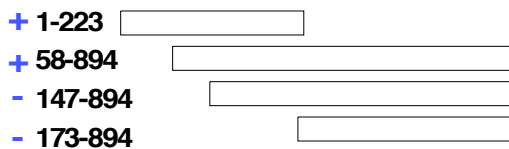

ABS (F-actin binding site)

SR (spectrin repeat)

EF (EF hand motif)

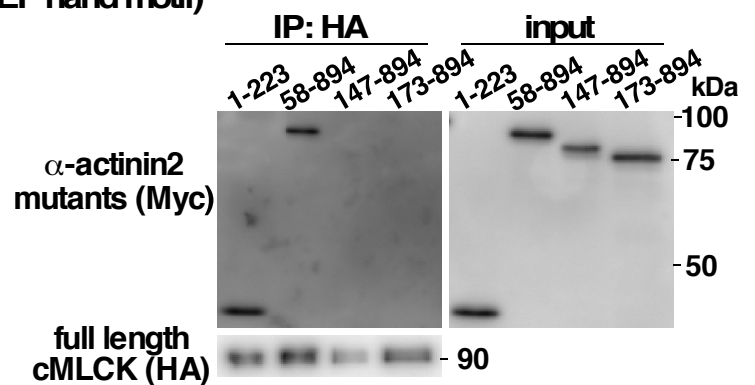

## Supplemental Figure 3

**Co-localization of HA-cMLCK( $\Delta$ 171-174) and  $\alpha$ -actinin2.** Representative co-immunostained adult cardiomyocytes isolated from *Myh3<sup>flox/flox</sup>/Cre* mice infected with HA-cMLCK( $\Delta$ 171-174) viral construct with HA (green) and  $\alpha$ -actinin2 (red) and merged images obtained from a confocal microscope. Enlarged images were shown.

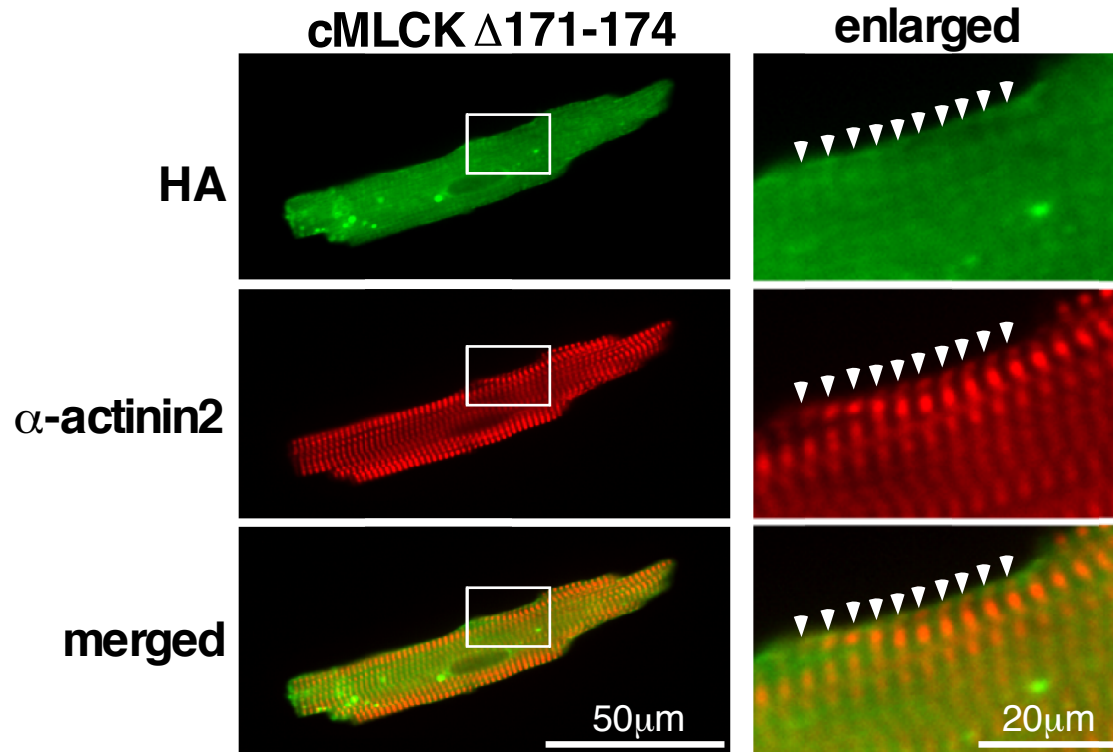

**Supplemental Figure 4. Full-length blots used for Figure 2D.**

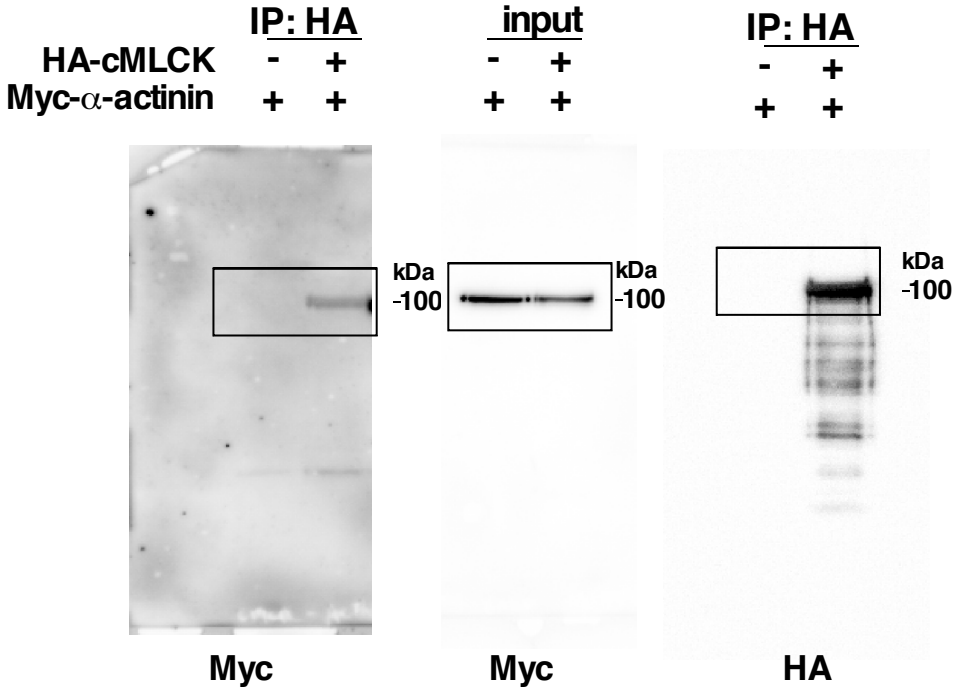

**Supplemental Figure 5. Full-length blots used for Figure 3C.**

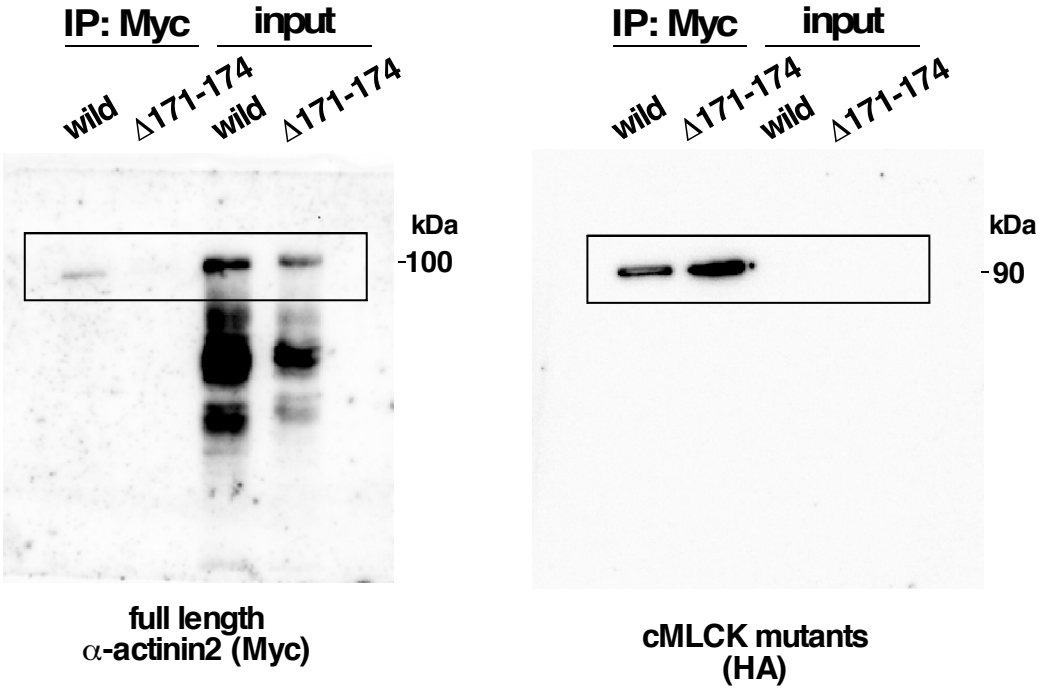

## Supplemental Figure 6. Full-length blots used for Figure 3D.

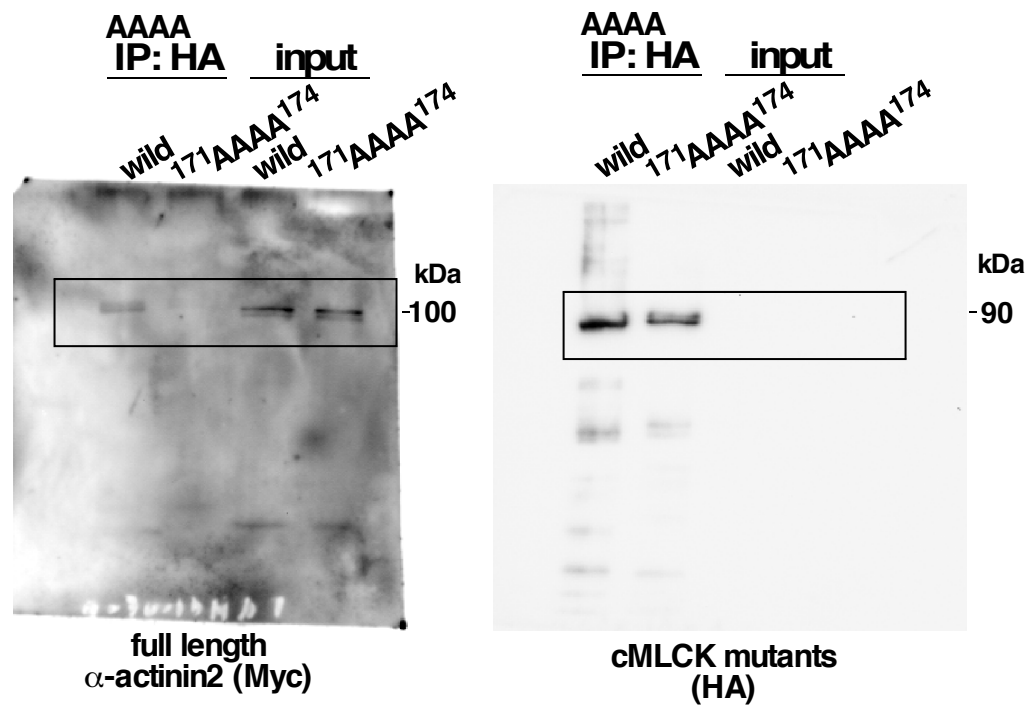

## Supplemental Figure 7. Full-length blots used for Figure 3F.

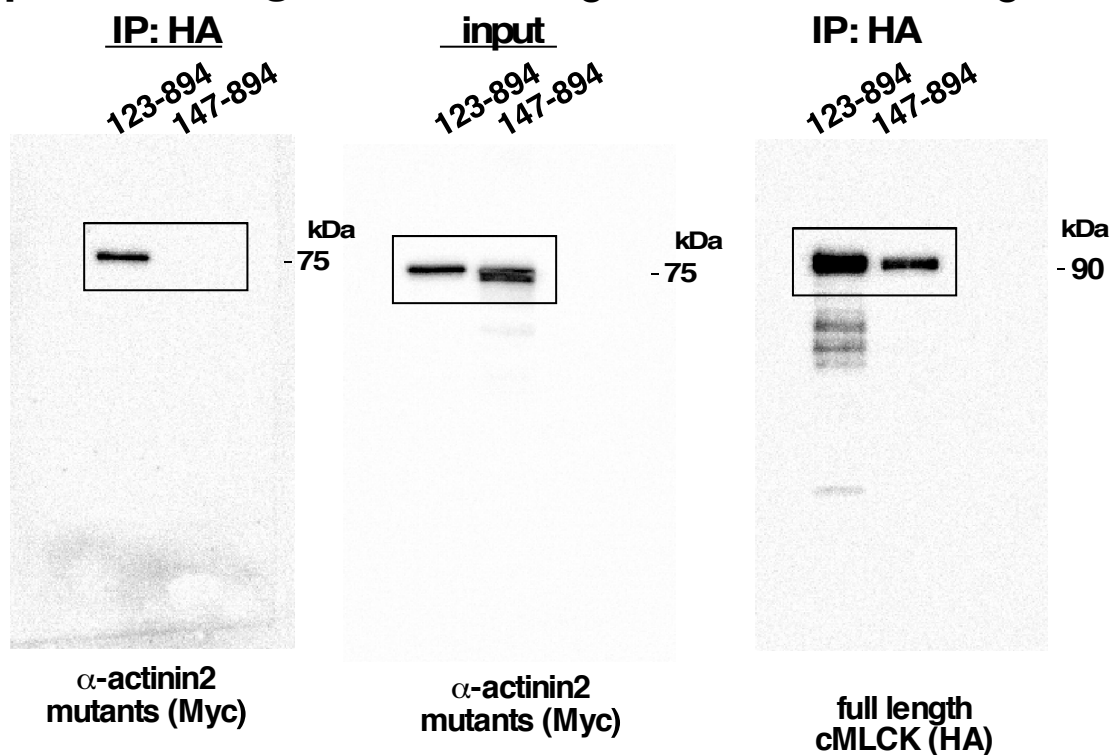

**Supplemental Figure 8.** Full-length autoradiographic and gel images used for Figure 4B.

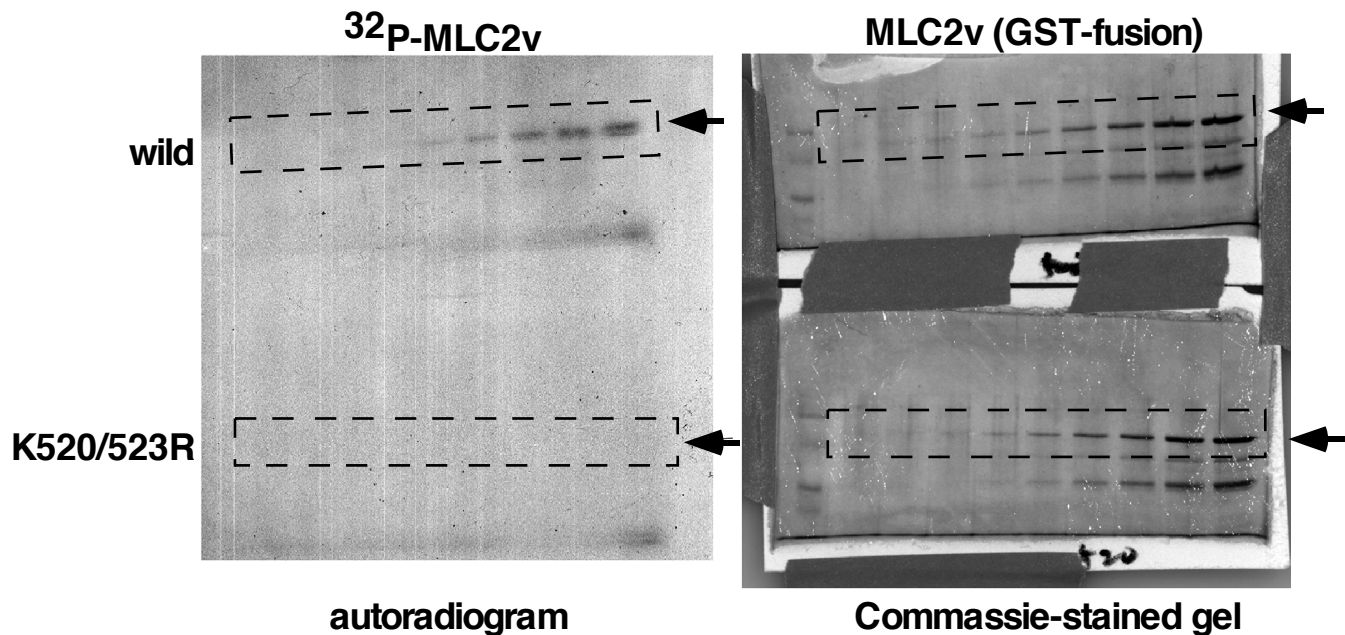

**Supplemental Figure 9.** Full-length blots used for Figure 4E.

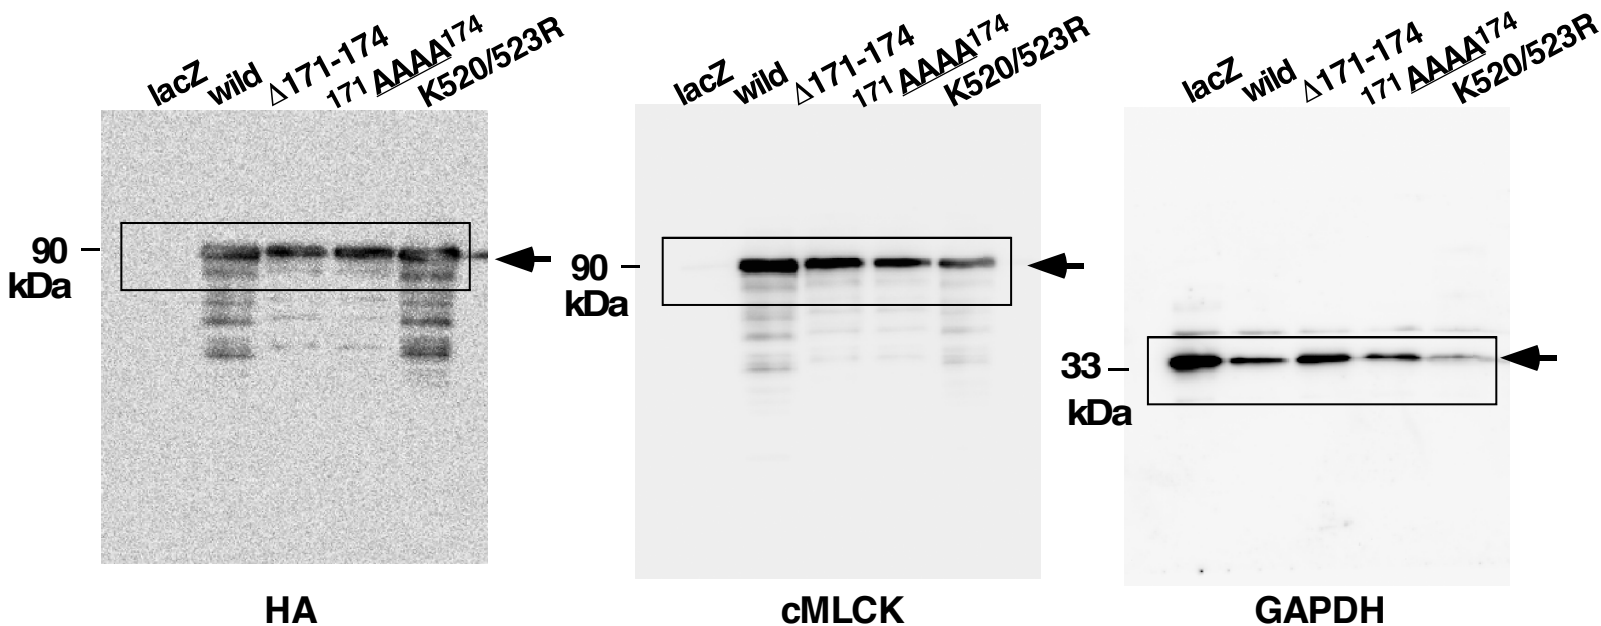

**Supplemental Figure 10.** Full-length blots used for Figure 5C.

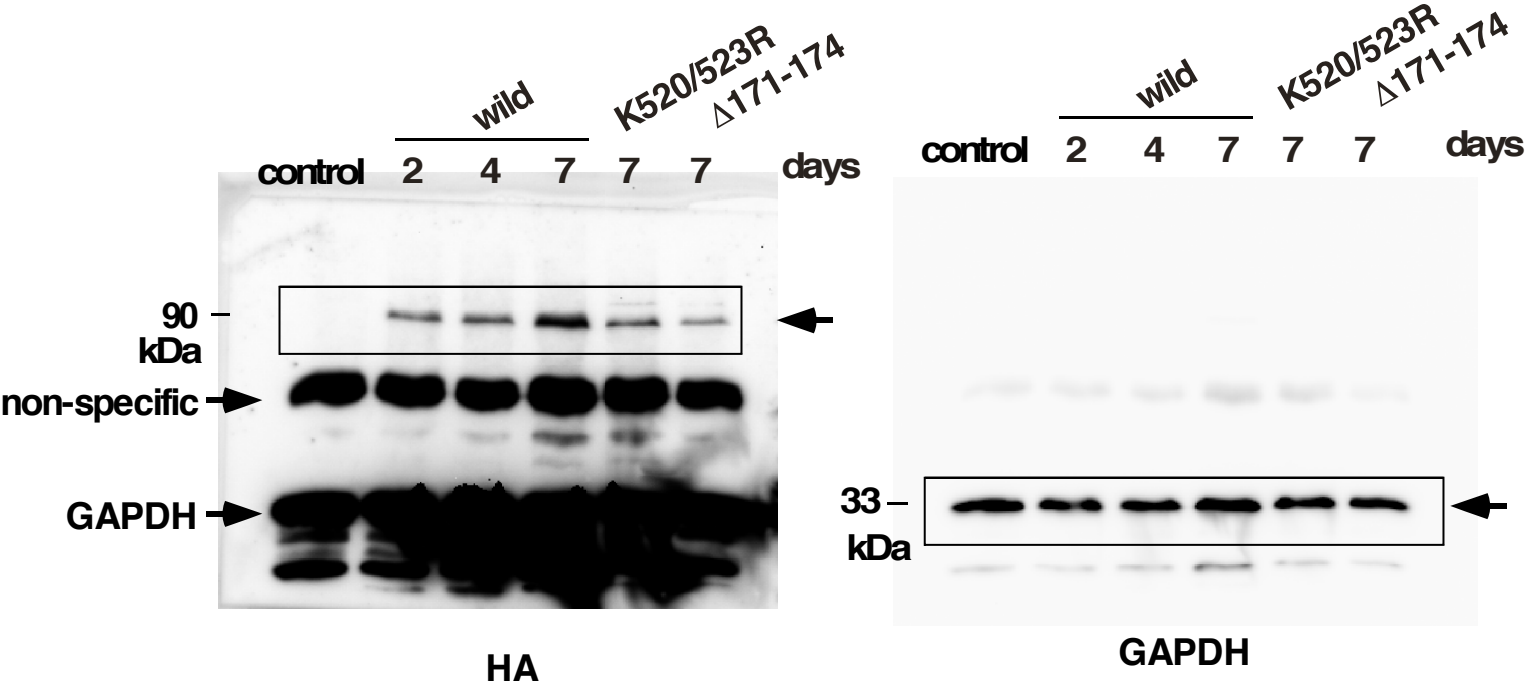

We were unable to find the full length blots used for Figures 2C and 3B, despite that we spent a large amount of time and efforts.
